# Supplementary material for: Fast and sensitive determination of sulfur dioxide in herbal medicines by microchip-based field asymmetric-wave ion mobility spectrometry
Source: Royal Society of Chemistry journal article supplement (doi:10.1039/c4ay02384f), 2014-11-20
Supplement: c4ay02384f1.pdf [file c4ay02384f1.pdf]

## Electronic Supplementary Information

# Fast and sensitive determination of sulfur dioxide in herbal medicines by microchip-based field asymmetric-wave ion mobility spectrometry

Xiaozhi Wang<sup>a\*</sup>, Weijun Zhao<sup>b</sup>, Lingfeng Li<sup>a</sup>, Xiangyang Wang<sup>a</sup>, Peng Li<sup>c</sup>, Yu Wang<sup>d\*</sup>, Jikui Luo<sup>a</sup>

<sup>a</sup>*Department of Information Science & Electronic Engineering, Zhejiang University, Hangzhou 310027, China*

<sup>b</sup>*Su Zhou Wei Mu Intelligent System Ltd., Suzhou 215163, China*

<sup>c</sup>*Suzhou Industrial Technology Research Institute of Zhejiang University, Suzhou 215163, China*

<sup>d</sup>*Institute for Food and Drug Control of Jiangsu, Nanjing, 210008, China*

### CONTENTS

Figure S1 The relationship between the ion current value and dew point of the scrubbed air.

Figure S1

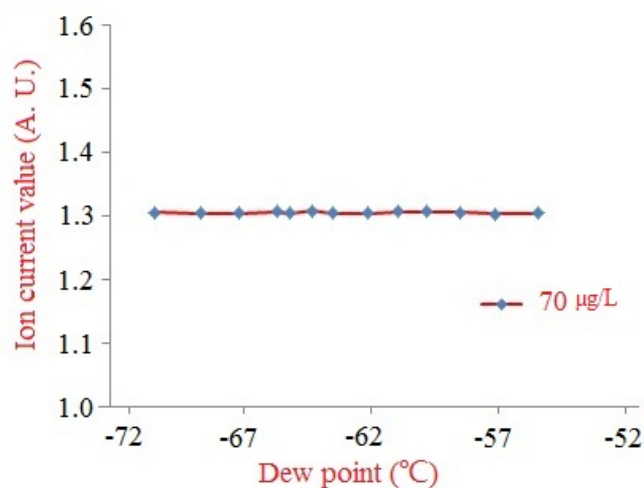

The detected signal of  $70 \mu\text{g/L } \text{SO}_2$  from a standard solution is constant when the dew point of the scrubbed air flow was changed from  $-70 \text{ }^\circ\text{C}$  to  $-55 \text{ }^\circ\text{C}$  and the dew point of the total flow was raised to around  $-40 \text{ }^\circ\text{C}$ , which was measured in between the membrane filter and the FAIMS instrument shown in Fig. 2.
